# Supplementary material for: Therapeutic Outcome of Second Primary Malignancies in Patients with Well-Differentiated Thyroid Cancer
Source: Hindawi journal article supplement (doi:10.1155/2016/9570171), 2016-01-01
Supplement: f1 [file 9570171.f1.pdf]

**SUPPLEMENTAL TABLE A: Second primary malignancy depending on timing of diagnosis in 200 patients with well-differentiated thyroid cancer**

| <b>Neoplasm</b>                | <b>All Patients</b> | <b>Anachronous and Synchronous</b> | <b>Metachronous</b> |
|--------------------------------|---------------------|------------------------------------|---------------------|
| <b>All sites</b>               | 200                 | 85 (42.5%) [71 ; 14]               | 115 (57.5%)         |
| <b>Oral cavity and pharynx</b> | 28 (14.0%)          | 22 (25.9%) [17 ; 5]                | 6 (5.2%)            |
| <b>Digestive system</b>        | 44 (22.0%)          | 14 (16.5%) [14 ; 0]                | 30 (26.1%)          |
| <b>Respiratory system</b>      | 18 (9.0%)           | 2 (2.4%) [0 ; 2]                   | 16 (13.9%)          |
| <b>Bones and joints</b>        | 2 (1.0%)            | 0                                  | 2 (1.7%)            |
| <b>Soft tissue</b>             | 3 (1.5%)            | 1 (1.2%) [0 ; 1]                   | 2 (1.7%)            |
| <b>Skin</b>                    | 6 (3.0%)            | 3 (3.5%) [2 ; 1]                   | 3 (2.6%)            |
| <b>Breast</b>                  | 45 (22.5%)          | 18 (21.2%) [16 ; 2]                | 27 (23.5%)          |
| <b>Female genital system</b>   | 19 (9.5%)           | 10 (11.8%) [7 ; 3]                 | 9 (7.8%)            |
| <b>Male genital system</b>     | 5 (2.5%)            | 3 (3.5%) [3 ; 0]                   | 2 (1.7%)            |
| <b>Urinary system</b>          | 13 (6.5%)           | 8 (9.4%) [8 ; 0]                   | 5 (4.3%)            |
| <b>Endocrine system</b>        | 1 (0.5%)            | 0                                  | 1 (0.9%)            |
| <b>Lymphoma</b>                | 6 (3.0%)            | 2 (2.4%) [2 ; 0]                   | 4 (3.5%)            |
| <b>Leukemia</b>                | 6 (3.0%)            | 1 (1.2%) [1 ; 0]                   | 5 (4.3%)            |
| <b>Miscellaneous</b>           | 4 (2.0%)            | 1 (1.2%) [1 ; 0]                   | 3 (2.6%)            |

Anachronous, diagnosed 6 months before thyroid cancer diagnosis; synchronous, and metachronous, diagnosed 6 months after thyroid cancer diagnosis

**SUPPLEMENTAL TABLE B: Clinical features of 2,864 cases of well-differentiated thyroid cancer classified into metachronous and non-metachronous groups**

| <b>Clinical characteristic</b>                                | <b>No SPM or anachronous/synchronous SPM</b> | <b>Metachronous SPM</b> | <b><i>P</i></b> |
|---------------------------------------------------------------|----------------------------------------------|-------------------------|-----------------|
| <b>Patient number</b>                                         | 2,749 (96.0%)                                | 115 (4.0%)              |                 |
| <b>Gender (female)</b>                                        | 2172 (79.0%)                                 | 84 (73.0%)              | 0.1252          |
| <b>Age at diagnosis (year)</b>                                | 43.7 ± 14.4                                  | 50.6 ± 12.5             | 0.0001          |
| <b>Mean tumor size (cm)</b>                                   | 2.4 ± 1.7                                    | 2.5 ± 1.5               | 0.7649          |
| <b>Thyroid operative method</b>                               |                                              |                         | 0.0270          |
| <b>Total thyroidectomy</b>                                    | 2336 (85.0%)                                 | 89 (77.4%)              |                 |
| <b>Less than total thyroidectomy</b>                          | 413 (15.0%)                                  | 26 (22.6%)              |                 |
| <b>TNM stage</b>                                              |                                              |                         | 0.0044          |
| <b>Stage I</b>                                                | 1889 (68.7%)                                 | 61 (53.0%)              |                 |
| <b>Stage II</b>                                               | 272 (9.9%)                                   | 15 (13.0%)              |                 |
| <b>Stage III</b>                                              | 214 (7.8%)                                   | 15 (13.0%)              |                 |
| <b>Stage IV</b>                                               | 374 (13.6%)                                  | 24 (20.9%)              |                 |
| <b>Non-remission</b>                                          | 434 (15.8%)                                  | 32 (27.8%)              | 0.0006          |
| <b>Follow-up period (year)</b>                                | 9.4 ± 6.7                                    | 11.7 ± 6.6              | 0.0002          |
| <b>Post-operative <sup>131</sup>I accumulative dose (mCi)</b> | 127.3 ± 187.0                                | 209.8 ± 302.0           | 0.0001          |
| <sup>131</sup> I dose ≥ 30 mCi                                | 2376 (86.4%)                                 | 101 (87.8%)             | 0.6682          |
| <b>Radiation therapy</b>                                      | 129 (4.7%)                                   | 14 (12.2%)              | 0.0003          |
| <b>Multifocality</b>                                          | 635 (23.1%)                                  | 27 (23.5%)              | 0.9248          |
| <b>Mortality due to thyroid cancer</b>                        | 150 (5.5%)                                   | 13 (11.3%)              | 0.0080          |
| <b>Overall mortality</b>                                      | 252 (9.2%)                                   | 49 (42.6%)              | 0.0001          |

Anachronous, diagnosed 6 months before thyroid cancer diagnosis; synchronous, and metachronous, diagnosed 6 months after thyroid cancer diagnosis

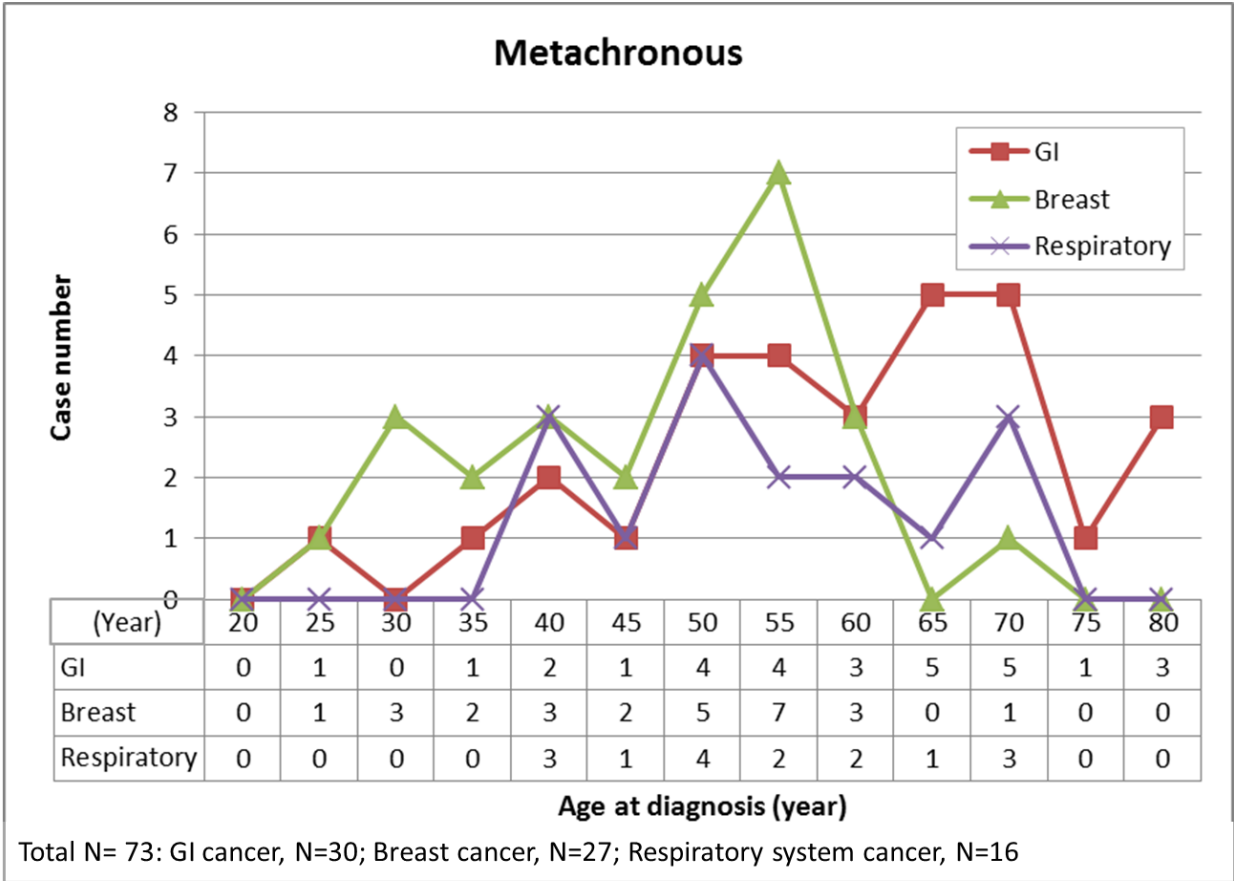

**SUPPLEMENTAL FIGURE: Age distribution and case number of top three metachronous secondary primary malignancy.**
